# Supplementary material for: Investigation of Causal Effect of Type 2 Diabetes Mellitus on Lung Cancer: A Mendelian Randomization Study
Source: Front Genet. 2021 Aug 31;12:673687. doi: 10.3389/fgene.2021.673687 (PMC8439278; doi:10.3389/fgene.2021.673687)
Supplement: Supplementary file 1 [file Data_Sheet_1.xlsx]

## Sheet: Supplementary Table 1
Supplementary Table 1. Basic information and clinical features of participants.
Characteristics	NJMU GSA							NJMU GWAS			NJMU Oncoarray
	Nanjing GSA		Beijing GSA		Zhongshan GSA
	Cases, N (%)	Controls, N (%)	Cases, N (%)	Controls, N (%)	Cases, N (%)	Controls, N (%)		Cases, N (%)	Controls, N (%)		Cases, N (%)	Controls, N (%)
Sample size	4149	3198	2155	2035	3944	4065		2126	3077		953	953
Age
< 60	1883 (45.41)	1429 (44.68)	1037 (48.12)	974 (47.86)	2145 (54.39)	2155 (53.03)		1001 (47.08)	1429 (46.44)		383 (40.19)	454 (47.64)
≥60	2264 (54.59)	1769 (55.32)	1118 (51.88)	1061 (52.14)	1799 (45.61)	1909 (46.97)		1125 (52.92)	1648 (53.56)		570 (59.81)	499 (52.36)
Gender
Male	2524 (60.83)	1886 (58.97)	1378 (63.94)	1303 (64.03)	2543 (64.48)	2682 (65.98)		1551 (72.95)	2086 (67.79)		626 (65.69)	648 (68.00)
Female	1625 (39.17)	1312 (41.03)	777 (36.06)	732 (35.97)	1401 (35.52)	1383 (34.02)		575 (27.05)	991 (32.21)		327 (34.31)	305 (32.00)
Smoking
Never	2175 (52.42)	2016 (63.04)	985 (45.71)	1124 (55.23)	2004 (50.81)	2314 (56.92)		769 (36.17)	1768 (57.46)		447 (46.90)	498 (52.26)
Ever	1972 (47.53)	1180 (36.90)	1170 (54.29)	911 (44.77)	1940 (49.19)	1751 (43.08)		1357 (63.83)	1309 (42.54)		506 (53.10)	455 (47.74)
Missing information	2 (0.05)	2 (0.06)	0 (0.00)	0 (0.00)	0 (0.00)	0 (0.00)		0 (0.00)	0 (0.00)		0 (0.00)	0 (0.00)
Histology
Squamous cell carcinoma	926 (22.32)	.	730 (33.87)	.	1048 (26.57)	.		822 (38.66)	.		334 (35.05)	.
Adenocarcinoma	2827 (68.14)	.	1364 (62.46)	.	2648 (67.14)	.		1304 (61.34)	.		619 (64.95)	.
Other a	396 (9.54)	.	61 (2.83)	.	248 (6.29)	.		0 (0.00)	.		0 (0.00)	.
aother histological types include large cell lung cancer and mixed cell lung cancer, except small cell lung cancer.

## Sheet: Supplementary Table 2
Supplementary Table 2. Details of the 82 single nucleotide polymorphisms (SNPs) used to construct the weighted genetic risk score (wGRS) predicting type 2 diabetes mellitus.
ChrPosID	SNPa	Nearby genea	EA/OAa	EAFa	betaa	Pa	SNPb	r2c
chr1:22068326	rs1825307	USP48	A/G	0.25	0.0582689	1.63e-09	rs1825307	1
chr1:51103268	rs12031188	FAF1	C/T	0.8	0.076961	2.52e-11	rs12031188	1
chr1:154309595	rs68062313	ATP8B2	TA/T	0.09	0.0953102	3.29e-08	rs2481065	0.477495
chr2:640986	rs72156956	TMEM18	C/CACAT	0.9	0.0953102	2.67e-10	rs4854344	0.987091
chr2:27734972	rs6547692	GCKR	A/G	0.44	0.0676586	3.9e-15	rs6547692	1
chr2:58921777	rs13417036	FANCL/BCL11A	A/G	0.16	0.0676586	1.67e-08	rs13417036	1
chr2:120231070	rs3731600	SCTR	C/G	0.95	0.122218	1.81e-08	rs3731600	1
chr2:149455385	rs16829174	EPC2	A/G	0.59	0.0487902	5.09e-09	rs16829174	1
chr2:165381518	rs75536691	GRB14	A/G	0.98	0.19062	9.46e-10	rs75536691	1
chr2:234303281	rs838720	DGKD	G/C	0.45	0.0487902	1.91e-09	rs838720	1
chr3:12385357	rs3963364	PPARG	C/A	0.96	0.14842	8.76e-09	rs3963364	1
chr3:23390507	rs12633613	UBE2E2	T/C	0.67	0.0953102	3.41e-23	rs12633613	1
chr3:63999322	rs3816157	PSMD6	G/A	0.68	0.076961	2.62e-15	rs3816157	1
chr3:121956953	rs2134223	CASR/CD86	A/G	0.47	0.0487902	5.2e-09	rs2134223	1
chr3:185495320	rs13092876	IGF2BP2	A/G	0.34	0.131028	6.11e-43	rs13092876	1
chr4:1244218	rs79407053	MAEA	G/A	0.69	0.10436	1.2e-24	rs79407053	1
chr4:6333669	rs35678078	WFS1	T/G	0.5	0.0582689	1.68e-08	rs35678078	1
chr4:45186139	rs10938398	GNPDA2/GABRG1	A/G	0.3	0.0582689	2.01e-09	rs10938398	1
chr4:71748245	rs12649012	GRSF1/MOB1B	G/A	0.21	0.0676586	3.43e-09	rs12649012	1
chr4:85301870	rs201597274	AGPAT9/NKX6-1	T/C	0.96	0.157004	2.07e-12	rs201597274	1
chr4:153520279	rs10011838	TMEM154	G/A	0.46	0.076961	2.73e-17	rs10011838	1
chr5:49953459	rs16884025	PARP8/EMB	C/T	0.93	0.131028	8.48e-09	rs16884025	1
chr5:52094244	rs11410487	ITGA1	A/AT	0.17	0.0676586	1.75e-08	rs4865744	1
chr5:55809138	rs256903	ANKRD55	A/C	0.47	0.076961	1.79e-16	rs256903	1
chr5:176513896	rs3135911	FGFR4/ZNF346	A/C	0.44	0.0582689	3.5e-10	rs3135911	1
chr6:7226959	rs9505085	SSR1/RREB1	C/T	0.67	0.0487902	2.85e-08	rs9505085	1
chr6:20688121	rs10440833	CDKAL1	A/T	0.42	0.173953	2.06e-85	rs10440833	1
chr6:31232543	rs2844623	POU5F1/TCF19	C/T	0.78	0.0953102	1.38e-17	rs2844623	1
chr6:39039140	rs9394574	KCNK16	A/G	0.82	0.0861777	4.35e-14	rs9394574	1
chr6:117996631	rs80196932	NUS1	T/C	0.75	0.0676586	8.37e-12	rs80196932	1
chr6:137293227	rs2327777	SLC35D3	T/C	0.39	0.0676586	5.34e-14	rs2327777	1
chr7:13888699	rs56805921	ETV1/ARL4A	C/G	0.43	0.0582689	2.51e-09	rs56805921	1
chr7:14898282	rs17168486	DGKB	T/C	0.4	0.0582689	2.34e-12	rs17168486	1
chr7:44174857	rs2908279	GCK	G/T	0.6	0.0676586	5.33e-12	rs2908279	1
chr7:69406661	rs6947395	AUTS2	T/A	0.2	0.0861777	4.87e-16	rs6947395	1
chr7:127253550	rs2233580	GCC1/PAX4	T/C	0.09	0.277632	4.1e-74	rs2233580	1
chr7:157038803	rs1182389	MNX1	G/A	0.46	0.0487902	1.13e-08	rs1182389	1
chr8:41512648	rs33981001	ANK1	GGT/G	0.44	0.0861777	7.99e-23	rs4737000	0.751991
chr8:118184783	rs13266634	SLC30A8	C/T	0.59	0.10436	2.52e-30	rs13266634	1
chr9:4289050	rs7034200	GLIS3	A/C	0.41	0.0582689	7.78e-12	rs7034200	1
chr9:22132729	rs10965247	CDKN2A/B	A/G	0.56	0.173953	9.85e-88	rs10965247	1
chr9:84308948	rs2796441	TLE1	G/A	0.38	0.076961	2.67e-19	rs2796441	1
chr9:139237902	rs28624681	GPSM1	C/T	0.88	0.131028	6.02e-21	rs28624681	1
chr10:12302607	rs10795945	CDC123/CAMK1D	T/C	0.45	0.10436	7.53e-27	rs10795945	1
chr10:71273357	rs1955163	VPS26A	G/A	0.51	0.0487902	2.91e-09	rs1955163	1
chr10:77314617	rs7900112	C10orf11/ZNF503	T/A	0.51	0.0487902	2.1e-09	rs7900112	1
chr10:80951130	rs34204798	ZMIZ1	C/CG	0.56	0.0676586	3.07e-14	rs703975	0.988643
chr10:94466439	rs12219514	HHEX/IDE	A/G	0.13	0.165514	4.82e-39	rs12219514	1
chr10:114754088	rs7901695	TCF7L2	C/T	0.04	0.29267	3.36e-49	rs7901695	1
chr10:122929493	rs10886863	WDR11/FGFR2	C/T	0.7	0.0582689	3.18e-09	rs10886863	1
chr10:124195485	rs7072204	PLEKHA1	A/G	0.43	0.0487902	2.22e-08	rs7072204	1
chr11:2858546	rs2237897	INS-IGF2_KCNQ1	C/T	0.62	0.262364	2.58e-168	rs2237897	1
chr11:35437863	rs2421897	SLC1A2	G/C	0.88	0.076961	6.58e-09	rs2421897	1
chr11:72428172	rs76550717	CENTD2/ARAP1	A/G	0.95	0.14842	1.26e-11	rs76550717	1
chr11:128389391	rs11819995	ETS1	T/C	0.22	0.0582689	9.76e-09	rs11819995	1
chr12:27963507	rs3751237	KLHDC5	T/G	0.69	0.0676586	7.38e-14	rs3751237	1
chr12:31476941	rs3214606	FAM60A	C/CAAGT	0.2	0.10436	1.85e-17	rs147538848	0.900221
chr12:108613151	rs11113776	WSCD2	G/A	0.46	0.0487902	1.28e-08	rs11113776	1
chr12:118406696	rs79310463	KSR2	T/C	0.26	0.0582689	1.83e-08	rs79310463	1
chr12:121327809	rs187150787	HNF1A	A/G	0.04	0.182322	6.03e-12	rs187150787	1
chr13:26781607	rs12874929	RNF6	A/G	0.55	0.0676586	1.24e-15	rs12874929	1
chr13:33554084	rs67148051	KL	AAGAC/A	0.14	0.10436	3.44e-15	rs576674	0.993464
chr13:51088809	rs123378	DLEU7/KCNRG	G/A	0.22	0.0582689	4.93e-09	rs123378	1
chr13:80708732	rs1327315	SPRY2	C/T	0.73	0.0953102	1.52e-19	rs1327315	1
chr15:38820647	rs11073333	RASGRP1	G/A	0.47	0.0582689	1e-10	rs11073333	1
chr15:40636418	rs746673	INAFM2	G/A	0.41	0.0676586	4.32e-14	rs746673	1
chr15:62394264	rs8037894	C2CD4A	G/C	0.58	0.076961	2.14e-17	rs8037894	1
chr15:77782335	rs12910361	HMG20A	G/A	0.41	0.0582689	1.24e-11	rs12910361	1
chr15:90393949	rs11435035	AP3S2	C/CT	0.34	0.0676586	3.13e-08	rs3759831	0.53754
chr15:91512067	rs2290203	PRC1	A/G	0.47	0.0582689	2.31e-10	rs2290203	1
chr16:20323168	rs117267808	GP2	A/G	0.08	0.113329	2.99e-12	rs117267808	1
chr16:53800954	rs1421085	FTO	C/T	0.2	0.122218	1.06e-28	rs1421085	1
chr17:4024824	rs113547729	ZZEF1	A/G	0.12	0.0861777	8.3e-09	rs113547729	1
chr17:6947453	rs74577409	SLC16A11/A13	G/C	0.08	0.131028	6.36e-16	rs74577409	1
chr17:36102381	rs11651052	HNF1B (TCF2)	A/G	0.32	0.113329	2.24e-34	rs11651052	1
chr17:40913366	rs9892728	MLX	C/T	0.47	0.0487902	4.16e-08	rs9892728	1
chr18:57838401	rs663129	MC4R	A/G	0.22	0.076961	5.23e-14	rs663129	1
chr18:60845884	rs12454712	BCL2A	T/C	0.48	0.0582689	3.02e-12	rs12454712	1
chr19:22257558	rs148316037	ZNF257	T/C	0.97	0.231112	5.1e-11	rs148316037	1
chr19:46166604	rs77300780	GIPR	T/C	0.54	0.076961	3.25e-19	rs77300780	1
chr20:42989777	rs16988991	HNF4A	A/G	0.45	0.0487902	3.77e-09	rs16988991	1
chr20:50155386	rs6021276	NFATC2	T/C	0.43	0.0582689	1.84e-09	rs6021276	1
Abbreviations: EA, effect allele; OA, other alleles; EAF, effect allele frequency.
a Details information extracted from previous reported GWAS;
b SNPs used in this study;
c Linkage disequilibrium estimation of SNPs in the previous study and SNPs used in this study based on the EAS population from 1000 Genomes Project Phase 3 data.
